# Supplementary material for: Mitochondrial proteomics on human fibroblasts for identification of metabolic imbalance and cellular stress
Source: PubMed Central journal article supplement (PMC2695441; doi:10.1186/1477-5956-7-20), 2009-05-28

### Amino acid metabolism

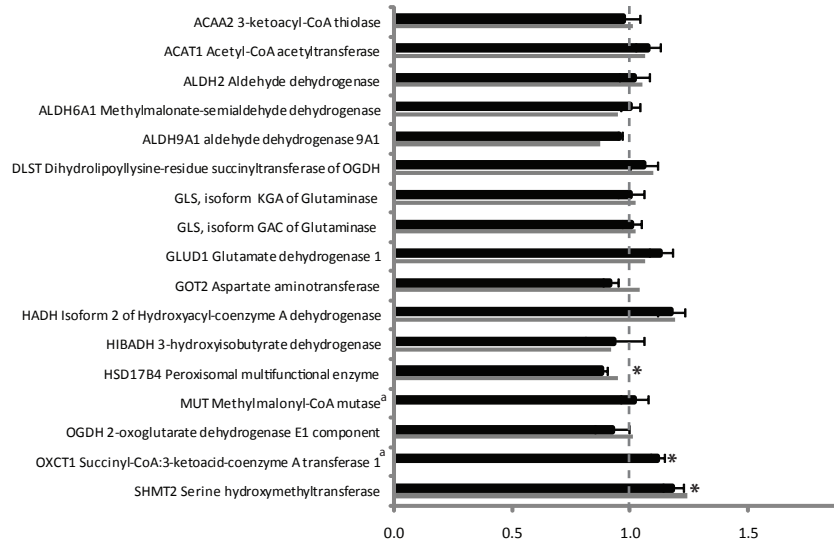

### Translation

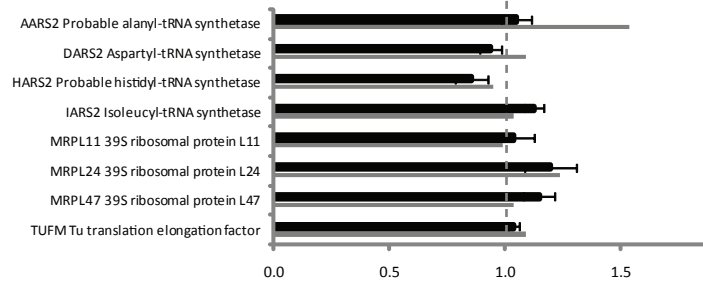

### Miscellaneous

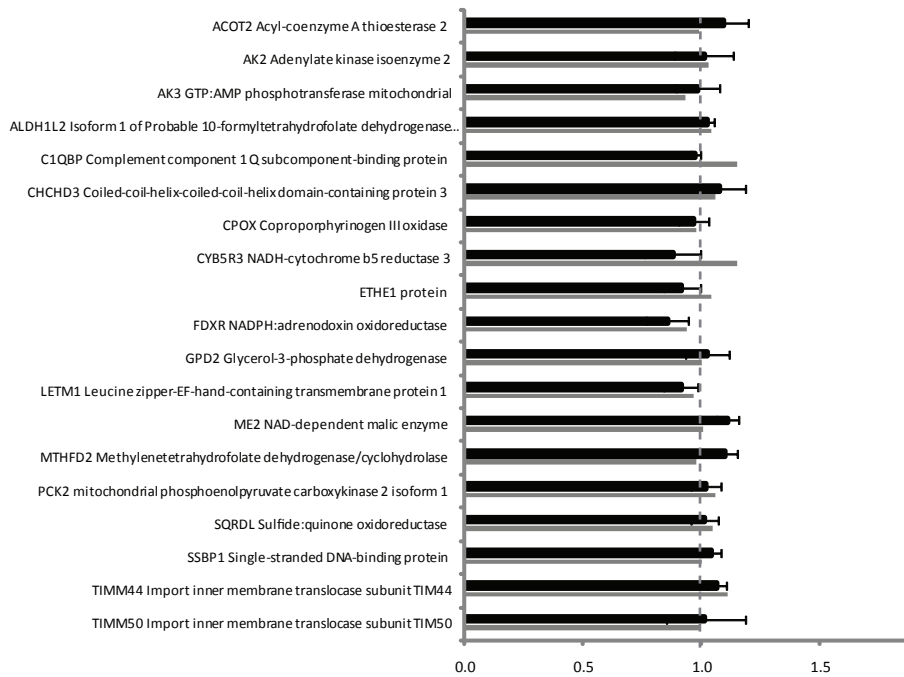

Supplement: 1477-5956-7-20-S7.pdf [file 1477-5956-7-20-S7.pdf]
