# Supplementary material for: Mitochondrial proteomics on human fibroblasts for identification of metabolic imbalance and cellular stress
Source: PubMed Central journal article supplement (PMC2695441; doi:10.1186/1477-5956-7-20), 2009-05-28
Supplement: 1477-5956-7-20-S8.pdf [file 1477-5956-7-20-S8.pdf]

| <b>HGNC<br/>gene<br/>code</b> | <b>Pathway</b> | <b>Protein</b>                                                               | <b>Disease</b>                                                                          | <b>OMIM<br/>(gene)</b> | <b>OMIM<br/>(disease)</b> |
|-------------------------------|----------------|------------------------------------------------------------------------------|-----------------------------------------------------------------------------------------|------------------------|---------------------------|
| <i>ACADM</i>                  | FAO            | Medium-chain Acyl-CoA dehydrogenase (MCAD)                                   | MCAD deficiency                                                                         | 607008                 | 201450                    |
| <i>ACADVL</i>                 | FAO            | Very long-chain Acyl-CoA dehydrogenase (VLCAD)                               | VLCAD deficiency                                                                        | 609575                 | 201475                    |
| <i>ACAT1</i>                  | AA             | Acetoacetyl-CoA thiolase                                                     | $\beta$ -ketothiolase deficiency                                                        | 607809                 | 203750                    |
| <i>ALDH2</i>                  | MISC           | Aldehyde dehydrogenase 2                                                     | Alcohol sensitivity, handover                                                           | 100650                 | 610251                    |
| <i>ALDH6A1</i>                | AA             | Methylmalonate semialdehyde dehydrogenase (MMSD)                             | MMSD deficiency                                                                         | 603178                 | 603178                    |
| <i>BAX</i>                    | APOP           | Bcl2 associated protein x                                                    | Cancer susceptibility                                                                   | 600040                 | 600040                    |
| <i>CPT1A</i>                  | FAO            | Hepatic CPT1                                                                 | Hepatic CPT1 deficiency                                                                 | 600528                 | 255120                    |
| <i>DARS2</i>                  | TRANS          | Aspartyl t-RNA synthetase                                                    | Leukoencephalopathy                                                                     | 610956                 | 611105                    |
| <i>DECR1</i>                  | MISC           | 2,4-dienoyl-CoA reductase (DECR)<br>Dihydrolipoamid dehydrogenase E3 subunit | DECR deficiency                                                                         | 222745                 | 222745                    |
| <i>DLD</i>                    | TCA            |                                                                              | $\alpha$ -keto glutarate dehydrogenase deficiency                                       | 238331                 | 238331                    |
| <i>ETFA</i>                   | FAO            | Electron transfer flavoprotein (ETF), $\alpha$ subunit                       | Multiple acyl-CoA dehydrogenase deficiency (MADD),<br>Glutaric aciduria, type II (GAII) | 608053                 | 231680                    |
| <i>ETFB</i>                   | FAO            | Electron transfer flavoprotein (ETF), $\beta$ subunit                        | Multiple acyl-CoA dehydrogenase deficiency (MADD),<br>Glutaric aciduria, type II (GAII) | 130410                 | 231680                    |
| <i>ETFDH</i>                  | FAO            | Electron transfer flavoprotein ubiquinone oxidoreductase, ETFQO              | Multiple acyl-CoA dehydrogenase deficiency (MADD),<br>Glutaric aciduria, type II (GAII) | 231675                 | 231680                    |
| <i>ETHE1</i>                  | MISC           | ETHE1 protein                                                                | Ethylmalonic encephalopathy                                                             | 608451                 | 602473                    |
| <i>FH</i>                     | TCA            | Fumarase                                                                     | Fumarase deficiency                                                                     | 136850                 | 606812                    |
| <i>GLUD1</i>                  | AA             | Glutamate dehydrogenase 1                                                    | Hyperinsulinism-hyperammonemia syndrome                                                 | 138130                 | 606762                    |
| <i>GPD2</i>                   | MISC           | Glycerol 3-phosphate dehydrogenase 2                                         | Noninsulin dependent diabetes mellitus                                                  | 138430                 | 125853                    |
| <i>HADH</i>                   | FAO            | 3-hydroxyacyl-CoA dehydrogenase, HADH (or M/SCHAD)                           | HADH (or M/SCHAD) deficiency                                                            | 601609                 | 231530                    |
| <i>HADHA</i>                  | FAO            | Mitochondrial trifunctional protein (MTP), $\alpha$ subunit                  | LCHAD deficiency; MTP deficiency                                                        | 600890                 | 609016                    |
| <i>HADHB</i>                  | FAO            | Mitochondrial trifunctional protein (MTP), $\beta$ subunit                   | MTP deficiency                                                                          | 143450                 | 609015                    |
| <i>HSD17B4</i>                | MISC           | 17- $\beta$ hydroxy steroid dehydrogenase IV, D-bifunctional protein         | D-bifunctional protein deficiency                                                       | 601860                 | 261515                    |
| <i>HSPD1</i>                  | PQC            | Heat shock 60-kd protein (HSP60)                                             | Spastic paraplegia 13                                                                   | 118190                 | 605280                    |
| <i>ME2</i>                    | MISC           | Malic enzyme 2                                                               | Susceptibility to idiopathic generalized epilepsy                                       | 154270                 | 600669                    |
| <i>NDUFA13</i>                | RESP           | NADH-ubiquinone oxidoreductase 1 $\alpha$                                    | Papillary thyroid carcinoma                                                             | 609435                 | 607464                    |
| <sup>o</sup> <i>NDUFS1</i>    | RESP           | NADH-ubiquinone oxidoreductase Fe-S 1                                        | Mitochondrial complex I deficiency                                                      | 157655                 | 252010                    |
| <i>NDUFS2</i>                 | RESP           | NADH-ubiquinone oxidoreductase Fe-S 2                                        | Mitochondrial complex I deficiency                                                      | 602985                 | 252010                    |
| <sup>o</sup> <i>NDUFS3</i>    | RESP           | NADH-ubiquinone oxidoreductase Fe-S 3                                        | Mitochondrial complex I deficiency                                                      | 603846                 | 256000                    |
| <i>NDUFV2</i>                 | RESP           | NADH-ubiquinone oxidoreductase flavoprotein 2                                | Mitochondrial complex I deficiency                                                      | 600532                 | 168600                    |
| <i>OGDH</i>                   | TCA            | $\alpha$ -keto glutarate dehydrogenase (E1k)                                 | $\alpha$ -keto glutarate dehydrogenase deficiency                                       | 203740                 | -                         |
| <i>OPA1</i>                   | APOP           | Optic atrophy 1 protein                                                      | Mitochondrial dysfunction                                                               | 605290                 | 165500                    |
| <i>PCK2</i>                   | MISC           | Phosphoenolpyruvate carboxykinase                                            | PEPCK deficiency, mitochondrial                                                         | 261650                 | -                         |
| <i>PDHA1</i>                  | TCA            | Pyruvate dehydrogenase complex E1 $\alpha$                                   | Pyruvate dehydrogenase deficiency                                                       | 312170                 | 308930                    |
| <i>PDHB</i>                   | TCA            | Pyruvate dehydrogenase complex E1 $\beta$                                    | Pyruvate dehydrogenase deficiency                                                       | 312170                 | 179060                    |
| <i>PHB</i>                    | PQC            | Prohibitin                                                                   | Breast cancer, sporadic                                                                 | 176705                 | -                         |
| <i>SDHB</i>                   | TCA / RESP     | Succinate dehydrogenase subunit B                                            | Paraganglioma and gastric stromal sarcoma                                               | 185470                 | 606864                    |
| <i>SUCLA2</i>                 | TCA            | Succinate-CoA ligase subunit $\beta$                                         | Mitochondrial DNA depletion syndrome,                                                   | 603921                 | 612073                    |

<sup>a</sup> Gene products with statistically significant altered level in the galactose cultivations.
